# Supplementary material
Source: publisher site journal article supplement (https://www.dovepress.com/get_supplementary_file.php?f=177206-3.xlsx)
Supplement: Supplementary file 1 [file get_supplementary_file.php]

## Sheet: Sheet1
			Table S3.A Collated RMSF data for each trajectory								Table S3.B Average RMSF values and SEM for each simulated EPO variant w/ SEM
			Q Simulation RMSF Data			AS1 Residues						R150Q	R150-WT	R150E	Q SEM	WT SEM	E SEM
					Q (T1)	Q (T2)	Q (T3)	AVG	SEM		LYS 20	0.523112	0.544993	0.521899	0.0261883	0.00832661	0.0156411
			LYS	20	0.572541	0.513401	0.483395	0.523112	0.0261883		THR 44	0.326957	0.311808	0.338908	0.00236053	0.000833168	0.0165299
			THR	44	0.323053	0.32661	0.331208	0.326957	0.00236053		LYS 45	0.61668	0.524712	0.587649	0.0129294	0.0311901	0.0801091
			LYS	45	0.591293	0.625117	0.633631	0.61668	0.0129294		VAL 46	0.335668	0.318079	0.343215	0.00402763	0.00191553	0.0100892
			VAL	46	0.328	0.337365	0.341639	0.335668	0.00402763		ASN 47	0.379767	0.337378	0.35474	0.0109463	0.00778732	0.0139114
			ASN	47	0.359188	0.383588	0.396525	0.379767	0.0109463		ARG 131	0.533853	0.705121	0.415917	0.059217	0.0846314	0.0112057
			ARG	131	0.578845	0.606234	0.416479	0.533853	0.059217		LYS 140	0.271681	0.270003	0.27834	0.00260821	0.000771871	0.00820493
			LYS	140	0.276878	0.268693	0.269472	0.271681	0.00260821		ARG 147	0.298717	0.303556	0.290871	0.00275026	0.00130043	0.00133012
			ARG	143	0.299562	0.293587	0.303001	0.298717	0.00275026		ASN 147	0.32025	0.246843	0.285704	0.0487938	0.00047823	0.0015557
			ASN	147	0.417838	0.271457	0.271456	0.32025	0.0487938		Q/R/E 150	0.330739	0.272008	0.403052	0.0367804	0.000768138	0.020524
			GLN	150	0.404033	0.299516	0.288669	0.330739	0.0367804
			WT Simulation RMSF Data			AS1 Residues
					WT (T1)	WT (T2)	WT (T3)	AVG	SEM
			LYS	20	0.565254	0.536888	0.532836	0.544993	0.00832661
			THR	44	0.311322	0.313768	0.310335	0.311808	0.000833168
			LYS	45	0.513021	0.465172	0.595942	0.524712	0.0311901
			VAL	46	0.313672	0.318889	0.321677	0.318079	0.00191553
			ASN	47	0.318418	0.345047	0.348669	0.337378	0.00778732
			ARG	131	0.832111	0.783529	0.499724	0.705121	0.0846314
			LYS	140	0.269312	0.268825	0.271873	0.270003	0.000771871
			ARG	143	0.306198	0.300694	0.303777	0.303556	0.00130043
			ASN	147	0.246142	0.248006	0.24638	0.246843	0.00047823
			ARG	150	0.27013	0.273047	0.272847	0.272008	0.000768138
			E Simulation RMSF Data			AS1 Residues
					E (T1)	E (T2)	E (T3)	AVG	SEM
			LYS	20	0.488093	0.554415	0.523189	0.521899	0.0156411
			THR	44	0.306139	0.375889	0.334695	0.338908	0.0165299
			LYS	45	0.447032	0.776485	0.539431	0.587649	0.0801091
			VAL	46	0.321745	0.364549	0.343351	0.343215	0.0100892
			ASN	47	0.327181	0.385876	0.351163	0.35474	0.0139114
			ARG	131	0.389592	0.43581	0.422349	0.415917	0.0112057
			LYS	140	0.264774	0.297965	0.272281	0.27834	0.00820493
			ARG	143	0.2888	0.289729	0.294085	0.290871	0.00133012
			ASN	147	0.285971	0.288862	0.282278	0.285704	0.0015557
			GLU	150	0.385521	0.452623	0.371013	0.403052	0.020524
													Table S4. Collated RMSF data for each trajectory								Table S5. Average RMSF values and SEM for each simulated EPO variant
													Q Simulation RMSF Data			AS1 Residues						R150Q	R150-WT	R150E	Q SEM	WT SEM	E SEM
															Q (T1)	Q (T2)	Q (T3)	AVG	SEM		LYS 20	0.523112	0.544993	0.521899	0.0261883	0.00832661	0.0156411
													LYS	20	0.572541	0.513401	0.483395	0.523112	0.0261883		THR 44	0.326957	0.311808	0.338908	0.00236053	0.000833168	0.0165299
													THR	44	0.323053	0.32661	0.331208	0.326957	0.00236053		LYS 45	0.61668	0.524712	0.587649	0.0129294	0.0311901	0.0801091
													LYS	45	0.591293	0.625117	0.633631	0.61668	0.0129294		VAL 46	0.335668	0.318079	0.343215	0.00402763	0.00191553	0.0100892
													VAL	46	0.328	0.337365	0.341639	0.335668	0.00402763		ASN 47	0.379767	0.337378	0.35474	0.0109463	0.00778732	0.0139114
													ASN	47	0.359188	0.383588	0.396525	0.379767	0.0109463		ARG 131	0.533853	0.705121	0.415917	0.059217	0.0846314	0.0112057
													ARG	131	0.578845	0.606234	0.416479	0.533853	0.059217		LYS 140	0.271681	0.270003	0.27834	0.00260821	0.000771871	0.00820493
													LYS	140	0.276878	0.268693	0.269472	0.271681	0.00260821		ARG 147	0.298717	0.303556	0.290871	0.00275026	0.00130043	0.00133012
													ARG	143	0.299562	0.293587	0.303001	0.298717	0.00275026		ASN 147	0.32025	0.246843	0.285704	0.0487938	0.00047823	0.0015557
													ASN	147	0.417838	0.271457	0.271456	0.32025	0.0487938		Q/R/E 150	0.330739	0.272008	0.403052	0.0367804	0.000768138	0.020524
													GLN	150	0.404033	0.299516	0.288669	0.330739	0.0367804
													WT Simulation RMSF Data			AS1 Residues
															WT (T1)	WT (T2)	WT (T3)	AVG	SEM
													LYS	20	0.565254	0.536888	0.532836	0.544993	0.00832661
													THR	44	0.311322	0.313768	0.310335	0.311808	0.000833168
													LYS	45	0.513021	0.465172	0.595942	0.524712	0.0311901
													VAL	46	0.313672	0.318889	0.321677	0.318079	0.00191553
													ASN	47	0.318418	0.345047	0.348669	0.337378	0.00778732
													ARG	131	0.832111	0.783529	0.499724	0.705121	0.0846314
													LYS	140	0.269312	0.268825	0.271873	0.270003	0.000771871
													ARG	143	0.306198	0.300694	0.303777	0.303556	0.00130043
													ASN	147	0.246142	0.248006	0.24638	0.246843	0.00047823
													ARG	150	0.27013	0.273047	0.272847	0.272008	0.000768138
													E Simulation RMSF Data			AS1 Residues
															E (T1)	E (T2)	E (T3)	AVG	SEM
													LYS	20	0.488093	0.554415	0.523189	0.521899	0.0156411
													THR	44	0.306139	0.375889	0.334695	0.338908	0.0165299
													LYS	45	0.447032	0.776485	0.539431	0.587649	0.0801091
													VAL	46	0.321745	0.364549	0.343351	0.343215	0.0100892
													ASN	47	0.327181	0.385876	0.351163	0.35474	0.0139114
													ARG	131	0.389592	0.43581	0.422349	0.415917	0.0112057
													LYS	140	0.264774	0.297965	0.272281	0.27834	0.00820493
													ARG	143	0.2888	0.289729	0.294085	0.290871	0.00133012
													ASN	147	0.285971	0.288862	0.282278	0.285704	0.0015557
													GLU	150	0.385521	0.452623	0.371013	0.403052	0.020524
